# Supplementary material for: Comparison of Iohexol-380 and Iohexol-350 for Coronary CT Angiography: A Multicenter, Randomized, Double-Blind Phase 3 Trial
Source: PubMed Central journal article supplement — Korean J Radiol. 2016 Apr 14;17(3):330–8. doi: 10.3348/kjr.2016.17.3.330 (PMC4842853; doi:10.3348/kjr.2016.17.3.330), 2016-04-14
Supplement: kjr-17-330-s001.pdf [file kjr-17-330-s001.pdf]

**Supplementary Table 1. Tasks Performed during Each Period**

| Tasks                                                                  | 1st Visit                                    | 2nd Visit | 3rd Visit                                   | Telephone Call                                            |
|------------------------------------------------------------------------|----------------------------------------------|-----------|---------------------------------------------|-----------------------------------------------------------|
|                                                                        | Screening<br>Up to 14 Days before<br>CT Scan | CT Scan   | 24 Hours<br>after Iohexol<br>Administration | Safety Follow-Up<br>7 Days after<br>CT Scan <sup>††</sup> |
| Inclusion and exclusion criteria                                       | √                                            | √         |                                             |                                                           |
| Demographic data and medical history                                   | √                                            |           |                                             |                                                           |
| Physical examination                                                   | √                                            |           |                                             |                                                           |
| Vital signs (including weight and height)                              | √                                            | √         |                                             |                                                           |
| 12-lead ECG                                                            | √                                            | √         |                                             |                                                           |
| Pregnancy test*                                                        | √                                            | √         |                                             |                                                           |
| Serology <sup>†</sup>                                                  | √                                            |           |                                             |                                                           |
| Urinalysis <sup>‡</sup>                                                | √                                            |           |                                             |                                                           |
| Laboratory tests: hematology <sup>§</sup> , biochemistry <sup>  </sup> | √                                            |           | √                                           |                                                           |
| Blood collection for pharmacokinetic analysis <sup>¶</sup>             |                                              | √         |                                             |                                                           |
| Prior/concomitant medication**                                         | √                                            | √         | √                                           | √                                                         |
| Record adverse events                                                  |                                              | √         | √                                           | √                                                         |
| Informed consent                                                       | √                                            |           |                                             |                                                           |
| Randomize to treatment                                                 |                                              | √         |                                             |                                                           |
| Administer iohexol                                                     |                                              | √         |                                             |                                                           |
| CT scan                                                                |                                              | √         |                                             |                                                           |

\*Urine test at screening and on day of CT scan, <sup>†</sup>Tests for hepatitis B surface antigen, hepatitis C, and HIV antibodies, <sup>‡</sup>Urinalysis - pH, protein, glucose, bilirubin, blood, microscopy for cells and casts, <sup>§</sup>Hematology - hemoglobin, packed cell volume, red blood cell count, mean corpuscular hemoglobin, mean corpuscular hemoglobin concentration, white blood cell count and differential, platelet count, <sup>||</sup>Clinical chemistry - sodium, potassium, uric acid, blood urea nitrogen, serum creatinine, total protein, albumin, total bilirubin, ALT, AST, alkaline phosphatase, GGT, non-fasting glucose, <sup>¶</sup>Pharmacokinetic assessments will be performed in subset of subjects in each group at selected centers only. Blood will be collected by intravenous catheter equipped with heplock using NaK3EDTA as anticoagulant at time points: pre-dose, 1, 5, 30, 60 minutes, 2, 4, 6, 8, 10 and 12 hours. Plasma samples will be separated by centrifugation and stored at -70°C until sample analysis. Plasma samples will be shipped to bioanalytical laboratory for iohexol concentration measurements, \*\*Prior medication (over previous 3 months) and continuing medication, <sup>††</sup>Subjects who experience delayed adverse reactions following CT scan should contact investigative site immediately. Depending on outcome of safety follow-up, subject may be requested to attend investigative site for additional visit(s) and/or examinations, at investigator's discretion. ALT = alanine transaminase, AST = aspartate aminotransferase, ECG = electrocardiography, GGT = gamma-glutamyl transpeptidase
