# Supplementary material for: Comparison of Iohexol-380 and Iohexol-350 for Coronary CT Angiography: A Multicenter, Randomized, Double-Blind Phase 3 Trial
Source: PubMed Central journal article supplement — Korean J Radiol. 2016 Apr 14;17(3):330–8. doi: 10.3348/kjr.2016.17.3.330 (PMC4842853; doi:10.3348/kjr.2016.17.3.330), 2016-04-14
Supplement: kjr-17-330-s002.pdf [file kjr-17-330-s002.pdf]

**Supplementary Table 2. Results of Hematology Test**

| Item                                                       | Treatment             | Visit             | n   | Mean ± SD    | P*    | P†    |
|------------------------------------------------------------|-----------------------|-------------------|-----|--------------|-------|-------|
| Hemoglobin (g/dL)                                          | Iohexol<br>380 mgI/mL | At screening      | 114 | 14.3 ± 1.6   | 0.734 | 0.531 |
|                                                            |                       | 24 hours after CT | 114 | 14.3 ± 1.5   |       |       |
|                                                            |                       | Change            | 114 | 0.02 ± 0.6   |       |       |
|                                                            | Iohexol<br>350 mgI/mL | At screening      | 110 | 14.4 ± 1.6   | 0.592 |       |
|                                                            |                       | 24 hours after CT | 110 | 14.3 ± 1.5   |       |       |
|                                                            |                       | Change            | 110 | -0.03 ± 0.6  |       |       |
| Packed cell volume (%)                                     | Iohexol<br>380 mgI/mL | At screening      | 114 | 42.0 ± 3.9   | 0.974 | 0.463 |
|                                                            |                       | 24 hours after CT | 114 | 42.0 ± 3.7   |       |       |
|                                                            |                       | Change            | 114 | 0.005 ± 1.8  |       |       |
|                                                            | Iohexol<br>350 mgI/mL | At screening      | 110 | 42.1 ± 4.0   | 0.315 |       |
|                                                            |                       | 24 hours after CT | 110 | 42.0 ± 4.0   |       |       |
|                                                            |                       | Change            | 110 | -0.17 ± 1.7  |       |       |
| Red blood cell count (10 <sup>6</sup> /mm <sup>3</sup> )   | Iohexol<br>380 mgI/mL | At screening      | 114 | 4.70 ± 0.43  | 0.635 | 0.608 |
|                                                            |                       | 24 hours after CT | 114 | 4.69 ± 0.40  |       |       |
|                                                            |                       | Change            | 114 | -0.01 ± 0.19 |       |       |
|                                                            | Iohexol<br>350 mgI/mL | At screening      | 110 | 4.67 ± 0.47  | 0.235 |       |
|                                                            |                       | 24 hours after CT | 110 | 4.65 ± 0.47  |       |       |
|                                                            |                       | Change            | 110 | -0.02 ± 0.19 |       |       |
| Mean corpuscular hemoglobin (pg)                           | Iohexol<br>380 mgI/mL | At screening      | 114 | 30.4 ± 2.2   | 0.135 | 0.992 |
|                                                            |                       | 24 hours after CT | 114 | 30.5 ± 2.2   |       |       |
|                                                            |                       | Change            | 114 | 0.08 ± 0.6   |       |       |
|                                                            | Iohexol<br>350 mgI/mL | At screening      | 110 | 30.7 ± 1.6   | 0.118 |       |
|                                                            |                       | 24 hours after CT | 110 | 30.8 ± 1.6   |       |       |
|                                                            |                       | Change            | 110 | 0.08 ± 0.5   |       |       |
| Mean corpuscular hemoglobin concentration (g/dL or %)      | Iohexol<br>380 mgI/mL | At screening      | 114 | 33.9 ± 1.3   | 0.630 | 0.794 |
|                                                            |                       | 24 hours after CT | 114 | 34.0 ± 1.4   |       |       |
|                                                            |                       | Change            | 114 | 0.03 ± 0.7   |       |       |
|                                                            | Iohexol<br>350 mgI/mL | At screening      | 110 | 34.0 ± 1.0   | 0.394 |       |
|                                                            |                       | 24 hours after CT | 110 | 34.1 ± 1.0   |       |       |
|                                                            |                       | Change            | 110 | 0.06 ± 0.7   |       |       |
| White blood cell count (10 <sup>3</sup> /mm <sup>3</sup> ) | Iohexol<br>380 mgI/mL | At screening      | 114 | 6.31 ± 1.41  | 0.121 | 0.283 |
|                                                            |                       | 24 hours after CT | 114 | 6.14 ± 1.30  |       |       |
|                                                            |                       | Change            | 114 | -0.18 ± 1.21 |       |       |
|                                                            | Iohexol<br>350 mgI/mL | At screening      | 110 | 6.39 ± 1.65  | 0.008 |       |
|                                                            |                       | 24 hours after CT | 110 | 6.02 ± 1.48  |       |       |
|                                                            |                       | Change            | 110 | -0.37 ± 1.42 |       |       |
| Lymphocytes (%)                                            | Iohexol<br>380 mgI/mL | At screening      | 114 | 34.6 ± 6.8   | 0.589 | 0.106 |
|                                                            |                       | 24 hours after CT | 114 | 34.3 ± 6.7   |       |       |
|                                                            |                       | Change            | 114 | -0.33 ± 6.4  |       |       |
|                                                            | Iohexol<br>350 mgI/mL | At screening      | 110 | 34.3 ± 8.0   | 0.088 |       |
|                                                            |                       | 24 hours after CT | 110 | 35.4 ± 7.8   |       |       |
|                                                            |                       | Change            | 110 | 1.09 ± 6.7   |       |       |
| Monocytes (%)                                              | Iohexol<br>380 mgI/mL | At screening      | 114 | 6.46 ± 1.82  | 0.074 | 0.688 |
|                                                            |                       | 24 hours after CT | 114 | 6.71 ± 1.80  |       |       |
|                                                            |                       | Change            | 114 | 0.25 ± 1.49  |       |       |
|                                                            | Iohexol<br>350 mgI/mL | At screening      | 110 | 6.62 ± 1.91  | 0.317 |       |
|                                                            |                       | 24 hours after CT | 110 | 6.79 ± 1.75  |       |       |
|                                                            |                       | Change            | 100 | 0.16 ± 1.72  |       |       |

**Supplementary Table 2. Results of Hematology Test (Continued)**

| Item                                               | Treatment             | Visit             | n   | Mean ± SD    | <i>P</i> * | <i>P</i> <sup>†</sup> |
|----------------------------------------------------|-----------------------|-------------------|-----|--------------|------------|-----------------------|
| Neutrophils segmented (%)                          | Iohexol<br>380 mgI/mL | At screening      | 114 | 55.6 ± 7.3   | 0.653      | 0.283                 |
|                                                    |                       | 24 hours after CT | 114 | 55.2 ± 7.4   |            |                       |
|                                                    |                       | Change            | 114 | -0.31 ± 7.3  |            |                       |
|                                                    | Iohexol<br>350 mgI/mL | At screening      | 110 | 55.5 ± 8.5   | 0.056      |                       |
|                                                    |                       | 24 hours after CT | 110 | 54.1 ± 8.2   |            |                       |
|                                                    |                       | Change            | 110 | -1.37 ± 7.5  |            |                       |
| Eosinophils (%)                                    | Iohexol<br>380 mgI/mL | At screening      | 114 | 2.29 ± 1.45  | 0.001      | 0.881                 |
|                                                    |                       | 24 hours after CT | 114 | 2.60 ± 1.69  |            |                       |
|                                                    |                       | Change            | 114 | 0.31 ± 1.04  |            |                       |
|                                                    | Iohexol<br>350 mgI/mL | At screening      | 110 | 2.53 ± 1.62  | 0.013      |                       |
|                                                    |                       | 24 hours after CT | 110 | 2.82 ± 1.81  |            |                       |
|                                                    |                       | Change            | 110 | 0.29 ± 1.20  |            |                       |
| Basophils (%)                                      | Iohexol<br>380 mgI/mL | At screening      | 114 | 0.51 ± 0.30  | 0.093      | 0.397                 |
|                                                    |                       | 24 hours after CT | 114 | 0.56 ± 0.35  |            |                       |
|                                                    |                       | Change            | 114 | 0.05 ± 0.34  |            |                       |
|                                                    | Iohexol<br>350 mgI/mL | At screening      | 110 | 0.55 ± 0.42  | 0.559      |                       |
|                                                    |                       | 24 hours after CT | 110 | 0.57 ± 0.38  |            |                       |
|                                                    |                       | Change            | 110 | 0.01 ± 0.30  |            |                       |
| Platelet count (10 <sup>3</sup> /mm <sup>3</sup> ) | Iohexol<br>380 mgI/mL | At screening      | 114 | 246.9 ± 53.1 | 0.775      | 0.596                 |
|                                                    |                       | 24 hours after CT | 114 | 246.2 ± 51.9 |            |                       |
|                                                    |                       | Change            | 114 | -0.6 ± 23.3  |            |                       |
|                                                    | Iohexol<br>350 mgI/mL | At screening      | 110 | 257.4 ± 51.5 | 0.651      |                       |
|                                                    |                       | 24 hours after CT | 110 | 258.5 ± 57.6 |            |                       |
|                                                    |                       | Change            | 110 | 1.1 ± 26.0   |            |                       |

\*Paired *t* test (within comparison), <sup>†</sup>Unpaired *t* test (between comparison). SD = standard deviation
