# Supplementary material for: Comparison of Iohexol-380 and Iohexol-350 for Coronary CT Angiography: A Multicenter, Randomized, Double-Blind Phase 3 Trial
Source: PubMed Central journal article supplement — Korean J Radiol. 2016 Apr 14;17(3):330–8. doi: 10.3348/kjr.2016.17.3.330 (PMC4842853; doi:10.3348/kjr.2016.17.3.330), 2016-04-14
Supplement: kjr-17-330-s003.pdf [file kjr-17-330-s003.pdf]

**Supplementary Table 3. Results of Biochemistry Test**

| Item                              | Treatment  | Visit             | n   | Mean $\pm$ SD    | <i>P</i> * | <i>P</i> <sup>†</sup> |
|-----------------------------------|------------|-------------------|-----|------------------|------------|-----------------------|
| Sodium<br>(mmol/L)                | 380 mgI/mL | At screening      | 114 | 140.4 $\pm$ 2.0  | 0.714      | 0.331                 |
|                                   |            | 24 hours after CT | 114 | 140.5 $\pm$ 1.6  |            |                       |
|                                   |            | Change            | 114 | 0.07 $\pm$ 2.0   |            |                       |
|                                   | 350 mgI/mL | At screening      | 110 | 140.4 $\pm$ 1.7  | 0.100      |                       |
|                                   |            | 24 hours after CT | 110 | 140.7 $\pm$ 1.7  |            |                       |
|                                   |            | Change            | 110 | 0.35 $\pm$ 2.2   |            |                       |
| Potassium<br>(mmol/L)             | 380 mgI/mL | At screening      | 114 | 4.21 $\pm$ 0.33  | 0.052      | 0.320                 |
|                                   |            | 24 hours after CT | 114 | 4.29 $\pm$ 0.40  |            |                       |
|                                   |            | Change            | 114 | 0.08 $\pm$ 0.42  |            |                       |
|                                   | 350 mgI/mL | At screening      | 110 | 4.22 $\pm$ 0.33  | 0.450      |                       |
|                                   |            | 24 hours after CT | 110 | 4.25 $\pm$ 0.34  |            |                       |
|                                   |            | Change            | 110 | 0.03 $\pm$ 0.35  |            |                       |
| Blood urea<br>nitrogen<br>(mg/dL) | 380 mgI/mL | At screening      | 114 | 12.8 $\pm$ 3.2   | 0.707      | 0.970                 |
|                                   |            | 24 hours after CT | 114 | 12.7 $\pm$ 3.1   |            |                       |
|                                   |            | Change            | 114 | -0.09 $\pm$ 2.7  |            |                       |
|                                   | 350 mgI/mL | At screening      | 110 | 13.0 $\pm$ 3.0   | 0.715      |                       |
|                                   |            | 24 hours after CT | 110 | 12.9 $\pm$ 3.3   |            |                       |
|                                   |            | Change            | 110 | -0.11 $\pm$ 3.1  |            |                       |
| Uric acid<br>(mg/dL)              | 380 mgI/mL | At screening      | 112 | 5.25 $\pm$ 1.41  | 0.672      | 0.954                 |
|                                   |            | 24 hours after CT | 112 | 5.27 $\pm$ 1.38  |            |                       |
|                                   |            | Change            | 112 | 0.03 $\pm$ 0.69  |            |                       |
|                                   | 350 mgI/mL | At screening      | 107 | 5.09 $\pm$ 1.51  | 0.723      |                       |
|                                   |            | 24 hours after CT | 107 | 5.11 $\pm$ 1.46  |            |                       |
|                                   |            | Change            | 107 | 0.02 $\pm$ 0.65  |            |                       |
| Serum<br>creatinine<br>(mg/dL)    | 380 mgI/mL | At screening      | 114 | 0.84 $\pm$ 0.17  | 0.705      | 0.932                 |
|                                   |            | 24 hours after CT | 114 | 0.85 $\pm$ 0.17  |            |                       |
|                                   |            | Change            | 114 | 0.004 $\pm$ 0.09 |            |                       |
|                                   | 350 mgI/mL | At screening      | 110 | 0.84 $\pm$ 0.20  | 0.766      |                       |
|                                   |            | 24 hours after CT | 110 | 0.85 $\pm$ 0.18  |            |                       |
|                                   |            | Change            | 110 | 0.002 $\pm$ 0.08 |            |                       |
| Total<br>protein<br>(g/dL)        | 380 mgI/mL | At screening      | 114 | 7.23 $\pm$ 0.42  | 0.105      | 0.641                 |
|                                   |            | 24 hours after CT | 114 | 7.18 $\pm$ 0.40  |            |                       |
|                                   |            | Change            | 114 | -0.05 $\pm$ 0.34 |            |                       |
|                                   | 350 mgI/mL | At screening      | 110 | 7.31 $\pm$ 0.35  | 0.024      |                       |
|                                   |            | 24 hours after CT | 110 | 7.23 $\pm$ 0.38  |            |                       |
|                                   |            | Change            | 110 | -0.07 $\pm$ 0.34 |            |                       |
| Albumin<br>(g/dL)                 | 380 mgI/mL | At screening      | 114 | 4.51 $\pm$ 0.26  | 0.110      | 0.838                 |
|                                   |            | 24 hours after CT | 114 | 4.47 $\pm$ 0.26  |            |                       |
|                                   |            | Change            | 114 | -0.04 $\pm$ 0.23 |            |                       |
|                                   | 350 mgI/mL | At screening      | 110 | 4.53 $\pm$ 0.24  | 0.028      |                       |
|                                   |            | 24 hours after CT | 110 | 4.49 $\pm$ 0.24  |            |                       |
|                                   |            | Change            | 110 | -0.04 $\pm$ 0.19 |            |                       |
| Total<br>bilirubin<br>(mg/dL)     | 380 mgI/mL | At screening      | 114 | 0.69 $\pm$ 0.27  | 0.024      | 0.348                 |
|                                   |            | 24 hours after CT | 114 | 0.76 $\pm$ 0.32  |            |                       |
|                                   |            | Change            | 114 | 0.06 $\pm$ 0.30  |            |                       |
|                                   | 350 mgI/mL | At screening      | 110 | 0.71 $\pm$ 0.39  | 0.0003     |                       |
|                                   |            | 24 hours after CT | 110 | 0.818 $\pm$ 0.44 |            |                       |
|                                   |            | Change            | 110 | 0.10 $\pm$ 0.28  |            |                       |

**Supplementary Table 3. Results of Biochemistry Test (Continued)**

| Item                              | Treatment             | Visit             | n   | Mean ± SD    | P*    | P <sup>†</sup> |
|-----------------------------------|-----------------------|-------------------|-----|--------------|-------|----------------|
| ALT<br>(IU/L)                     | Iohexol<br>380 mgI/mL | At screening      | 114 | 20.5 ± 12.1  | 0.790 | 0.587          |
|                                   |                       | 24 hours after CT | 114 | 20.3 ± 11.9  |       |                |
|                                   |                       | Change            | 114 | -0.19 ± 7.7  |       |                |
|                                   | Iohexol<br>350 mgI/mL | At screening      | 110 | 22.2 ± 15.7  | 0.626 |                |
|                                   |                       | 24 hours after CT | 110 | 22.6 ± 17.8  |       |                |
|                                   |                       | Change            | 110 | 0.41 ± 8.8   |       |                |
| AST<br>(IU/L)                     | Iohexol<br>380 mgI/mL | At screening      | 114 | 20.3 ± 6.2   | 0.776 | 0.786          |
|                                   |                       | 24 hours after CT | 114 | 20.4 ± 6.8   |       |                |
|                                   |                       | Change            | 114 | 0.15 ± 5.6   |       |                |
|                                   | Iohexol<br>350 mgI/mL | At screening      | 110 | 20.5 ± 6.2   | 0.934 |                |
|                                   |                       | 24 hours after CT | 110 | 20.5 ± 7.4   |       |                |
|                                   |                       | Change            | 110 | -0.04 ± 4.6  |       |                |
| Alkaline<br>phosphatase<br>(IU/L) | Iohexol<br>380 mgI/mL | At screening      | 114 | 88.4 ± 62.3  | 0.458 | 0.560          |
|                                   |                       | 24 hours after CT | 114 | 89.0 ± 64.8  |       |                |
|                                   |                       | Change            | 114 | 0.6 ± 8.3    |       |                |
|                                   | Iohexol<br>350 mgI/mL | At screening      | 110 | 92.1 ± 65.4  | 0.921 |                |
|                                   |                       | 24 hours after CT | 110 | 92.0 ± 65.9  |       |                |
|                                   |                       | Change            | 110 | -0.1 ± 8.6   |       |                |
| GGT<br>(IU/L)                     | Iohexol<br>380 mgI/mL | At screening      | 113 | 24.8 ± 19.1  | 0.260 | 0.867          |
|                                   |                       | 24 hours after CT | 113 | 24.3 ± 19.2  |       |                |
|                                   |                       | Change            | 113 | -0.6 ± 5.2   |       |                |
|                                   | Iohexol<br>350 mgI/mL | At screening      | 110 | 28.2 ± 27.9  | 0.481 |                |
|                                   |                       | 24 hours after CT | 110 | 27.8 ± 29.3  |       |                |
|                                   |                       | Change            | 110 | -0.4 ± 6.3   |       |                |
| Non-fasting<br>glucose<br>(mg/dL) | Iohexol<br>380 mgI/mL | At screening      | 114 | 97.3 ± 19.4  | 0.060 | 0.083          |
|                                   |                       | 24 hours after CT | 114 | 101.8 ± 25.5 |       |                |
|                                   |                       | Change            | 114 | 4.5 ± 25.5   |       |                |
|                                   | Iohexol<br>350 mgI/mL | At screening      | 110 | 99.6 ± 27.6  | 0.600 |                |
|                                   |                       | 24 hours after CT | 110 | 98.5 ± 20.7  |       |                |
|                                   |                       | Change            | 110 | -1.2 ± 23.6  |       |                |

\*Paired *t* test (within comparison), <sup>†</sup>Unpaired *t* test (between comparison). ALT = alanine transaminase, AST = aspartate aminotransferase, GGT = gamma-glutamyl transpeptidase, SD = standard deviation
